# Supplementary material for: High Levels of Canonical Wnt Signaling Lead to Loss of Stemness and Increased Differentiation in Hematopoietic Stem Cells
Source: PubMed Central journal article supplement — Stem Cell Reports. 2016 May 10;6(5):652–9. doi: 10.1016/j.stemcr.2016.04.009 (PMC4939829; doi:10.1016/j.stemcr.2016.04.009), 2016-05-10
Supplement: mmc1.pdf [file mmc1.pdf]

**Stem Cell Reports, Volume 6**

**Supplemental Information**

**High Levels of Canonical Wnt Signaling Lead to Loss of Stemness and  
Increased Differentiation in Hematopoietic Stem Cells**

**Farbod Famili, Martijn H. Brugman, Erdogan Taskesen, Brigitta E.A. Naber, Riccardo Fodde, and Frank J.T. Staal**

## Supplementary Experimental Procedures

### High levels of canonical Wnt signaling lead to loss of stemness and increased differentiation in hematopoietic stem cells.

Farbod Famili, Martijn H. Brugman, Erdogan Taskesen, Brigitta E.A. Naber, Riccardo Fodde, Frank J.T. Staal

#### Supplemental Experimental procedures

Mouse bone marrow (BM) cells were isolated from femurs and tibiae, which were crushed in a mortar and filtered through 70  $\mu$ m filters. The cells were stained using biotinylated lineage antibodies (MAC-1/CD11b, B220/CD45R, CD3e, CD4, NK1.1, Gr1, Ter119), Streptavidin PE, CD117 APC and Sca1 PECy7. LSK cells were isolated using a BD Aria II SORP cell sorter (Beckton-Dickinson) and were collected in Stemspan (Stem Cell Technologies), supplemented with mFlt3L (50 ng/ml), rmSCF (100 ng/ml) and rmTPO (10 ng/ml), all cytokines purchased from R&D systems. The cells were incubated for 16 hr at 37°C and 5% CO<sub>2</sub>. LSKs from Apc 15 Lox heterozygous mice with mildly elevated Wnt levels were shown to perform better in reconstitution experiments but are not integral part of the current study, as only subtle changes in gene expression were found.

#### Retroviral Production and Transduction

MSCV-Cre-IRES-GFP plasmid was kindly provided by H. Nakauchi (Institute of Medical Science, University of Tokyo, Japan) and viruses were generated with the Phoenix-packaging cell line. 40,000–70,000 sorted LSKs were stimulated overnight in serum-free medium (StemCell Technologies) supplemented with cytokines (100 ng/ml rmSCF, 10 ng/ml rmTPO, and 50 ng/ml rmFlt3L; from R&D) and transduced by spinoculation (800 x g, 2 hours, 32°C) with titrated amounts of virus with Retronectin (Takara Bio Inc.). Cells were cultured for 2 additional days. Subsequently, Cre-GFP expressing LSK cells were isolated using flow cytometric cell sorting and collected for RNA expression. For in vitro assays including apoptosis, proliferation and differentiation assays bulk of transduced and untransduced cells were used.

#### RNA amplification

RNA was isolated from the sorted transduced cells using Qiagen RNEasy micro columns (Qiagen, Hilden, Germany). RNA of more than 10,000 cells were then amplified using the Ovation RNA amplification system v2 (Nugen Inc., San Carlos, CA, USA), processed using the Encore Biotin module (Nugen) and hybridized to Affymetrix mouse 430 2.0 Genechip arrays.

Data is available at the NCBI Gene Expression Omnibus (GEO), accession number GSE79495

**Gene expression normalization.** Gene expression data was measured in two batches. Raw data is normalized per batch with Robust Multi-Array Average (RMA), and batch correction is applied using Combat. Intensity values were mean centered per probe set. Gene symbols are mapped using MM9. As a result of the normalization, probe-intensity values follow a normal distribution for which intensities higher than 0 are up-regulated, and intensities lower than 0 are down-regulated. Principal component analysis and pairwise correlations across the 21 samples showed the expected results; wild-type and mutants, t1572, n1638, and Knock-Out samples are different from each other in the PCA-space and correlation map.

**Gene expression analysis.** Differential expressed genes for the APC samples are determined by using Limma, and genes are considered to be differential expressed between the two selected groups if mRNA levels differ with  $P \leq 0.05$  after multiple test correction using Holm.

**ChIP-Seq normalization.** In this study we used massively parallel sequenced DNA-fragments bound by the transcription factors, TCF1, TCF7, and  $\beta$ -catenin. All the sequencing data is aligned using Burrows-Wheeler transformation (BWA), according MM9. We used several literature sources (Li et al., 2013a; Steinke et al., 2014; Zhang and Li, 2008; Zhang et al., 2000) (Wu et al., 2012).

**ChIP-Seq analysis.** Binding of transcription factors is determined by utilizing Hypergeometric Analysis of Tiling arrays (HATSEQ). A binding event was called when fragments are enriched based on default parameter settings, i.e., FWER significance level  $< 0.05$ , and a bandwidth (fragment size) of 300bp. We mapped the significantly detected binding sites to RefSeq genes in UCSC mm9 database (genome.ucsc.edu). A gene was designated as the target gene if the peak was present within 5000bp upstream of the transcription start site or inside of the gene.

For TCF1 (in mature CD8 T cells, accession number GSM1258235), we detected 591 significantly enriched regions (ranges between 104bp-1048bp, median: 233bp) by comparing it to control IgG using sorted post-select DP and CD4<sup>+</sup>8<sup>o</sup> thymocytes<sup>1</sup> (accession number GSM1258236). The detected regions could subsequently be mapped to 116 unique genes. For the two TCF1 experiments in murine thymocytes (GSM1285796 for TCF1-CAT and GSM1133644 for TCF1), we detected 732 (size ranges between 102bp-2632bp, median: 237bp), and 2600 (102bp-2632bp, median: 237bp) significant binding regions respectively after comparing to control TCF1-CAT-INPUT (GSM1285797) and TCF1-INPUT (GSM1133645) respectively. The detected regions could subsequently be mapped to respectively 131, and 653 unique genes (Table S2). The third analyzed ChIP-Seq data set was the binding of TCF7 (GSM773994). For TCF7 we detected 6395 significant binding regions (size ranges between 103bp-5840bp, median: 341bp) by comparing it to one control (input DNA of TCF7). These regions are subsequently mapped to 2015 genes (Table S2). The fourth public data set that we analyzed were three Beta-Catenin experiments, two with biotinylation and one based on FLAG-tag technology. As a background four different controls are used per experiment (2 with Beta-Catenin biotin without GSK and two GSK input samples). This resulted in respectively 990, 385, and 671 significant binding regions for Beta-Catenin-Biotin-rep1, Beta-Catenin-Biotin-rep2, and Beta-Catenin-Flag-rep1 and were mapped to 121, 49, and 79 genes (Table S2). Binding sites have median size of 336bp, 385bp, and 320bp.

To test the validity of the detected binding regions of each experiment, we expected an overrepresentation of WNT-associated genes. To test this, we overlaid the mapped genes with known WNT-associated genes ( $n=1136$ ) from the Molecular Signature Database (MSigDB, v4.0), and detected that all seven ChIP-seq experiment showed a significant enrichment for binding in close vicinity of WNT-associated genes ( $P \leq 0.05$ , Table S1) based on the hypergeometric test. As an example, all seven experiments showed binding of in the transcriptional start site of *Axin2* (Figure S4A), whereas TCF1, and Beta-Catenin experiments showed also binding for *Lef1* (Figure S4A).

**Pathway Analysis.** Pathway analysis is performed by utilizing the Molecular Signature Database (MSigDB, v4.0) for the detection of enriched curated gene sets (C2), motif gene sets (C3), computational gene sets (C4), GO gene sets (C5), oncogenic signatures (C6), and immunologic signatures (C7). Gene sets and signatures are considered statistically significant when the P-value, derived from the hypergeometric test, is less or equal than 0.05 after correcting for multiple testing using Holm.

## Mice

Mice were bred and maintained in the animal facilities of Leiden University Medical Center, in accordance with legal regulations in The Netherlands and with the approval of the Dutch animal ethical committee. C57Bl/6-CD45.1 (Ly5.1) and C57Bl/6-CD45.2 (Ly5.2) mice were obtained from the Jackson Laboratory. Mice

carrying targeted mutations on Apc were previously described (Fodde et al., 1994; Robanus-Maandag et al., 2010; Smits et al., 1999) and continuously backcrossed to C57Bl/6 background.

### **Flow Cytometry**

The following antibodies were obtained from BD Biosciences (San Diego, CA): anti CD11b-PE (M1/70), anti CD19-APC (ID3) and anti CD117 (2B6). For Lineage depletion these markers were used: CD3 (145-2C11), CD4 (L3T4), CD8 (53-6.7), CD11b (M1/70), Gr1 (RB6-8C5), B220 (Ra3-6B2), Ter119 (Ly76) and Nk1.1 (PK136) biotin and subsequently were stained with streptavidin eFluor 450 (48-4317) from eBioscience. The following antibodies were also purchased from eBiosciences: B220 PE-Cy7 (RA3-6B2), Gr1 eFluor 450 (RB6-8C5) and Sca1 PE-Cy7 (D7). Cells were stained in Fluorescenceactivated cell sorter (FACS) buffer (PBS, 2% bovine serum albumin, 0.1% sodium azide) for 30 min at 4 °C. Ultimately, Cells were washed and measured either on a Canto I, or an Aria (BD Biosciences). Data were analyzed using FlowJo software (Tree Star, Ashland, OR, USA).

### **Proliferation, apoptosis and differentiation assays**

$5 \times 10^4$  sorted BM LSKs from APC WT and APC 15lox/15lox mice were transduced with titrated amount of CRE viruses in stemspan with FTS cytokines as previously described. For apoptosis assay harvested cells after 2 days (Day 0) or 5 days (Day 3) of culture, cells were stained with either 7AAD/AnnexinV (BD Bioscience), or PE-Active caspase-3 apoptosis kit (BD pharmingen) according to the manufacturer's instruction. For proliferation assay, cells were labelled with 5  $\mu$ M Cell Proliferation Dye eFluor® 670 (eBioscience) at Day 0. Subsequently, cells were harvested at Day 3 and were assessed by flow cytometry for proliferation.

For differentiation assay  $2 \times 10^4$  BM LSKs were used and transduced cells at Day 0 were transferred onto confluent monolayers of OP9 WT and cocultured for additional 14 days with AlphaMEM 10% FCS containing 50 ng/ml rmSCF, 10 ng/ml rmFlt3L and 10 ng/ml rmIL-7 (all cytokines from R&D). After 7 days cells were harvested and transferred onto new monolayer of OP9 cells, and half of the medium were replaced every 3-4 days. Finally, after 14 days of coculture cells were harvested and assessed by flow cytometry for B and myeloid lineage differentiation.

### Supplemental Figure Legends

**Suppl. Fig 1a:** Validation of differential gene expression by Q-PCR. Sorted LSK cells were cultured and transduced with CRE-GFP as described in the supplemental experimental procedures. RNA was isolated and used for analysis by Q-PCR for the indicated Wnt target genes.

**Suppl. Fig 1b:** Biological processes associated with clusters 1 and 2. For details see text

**Suppl. Fig 2:** High Wnt signaling is associated with differentiation into monocytes and B lymphocytes based on published gene sets.

**Suppl. Fig 3:** No differences in apoptosis and cell cycle in high Wnt signature when compared to published gene sets.

**Suppl. Fig 4a:** Tcf and beta catenin binding sites in the Lef1 and Axin2 promoters based on literature data mining of CHIP-Seq data

**Suppl. Fig 4b:** Differentially expressed genes from the gene expression profiles of heterozygote samples against 1572T,1638N, and full KO, and detected in A. 157 differential expressed genes with  $P < 0.05$  and B. the representation of 55 unique gene sets (see also Table S3)



Figure S2

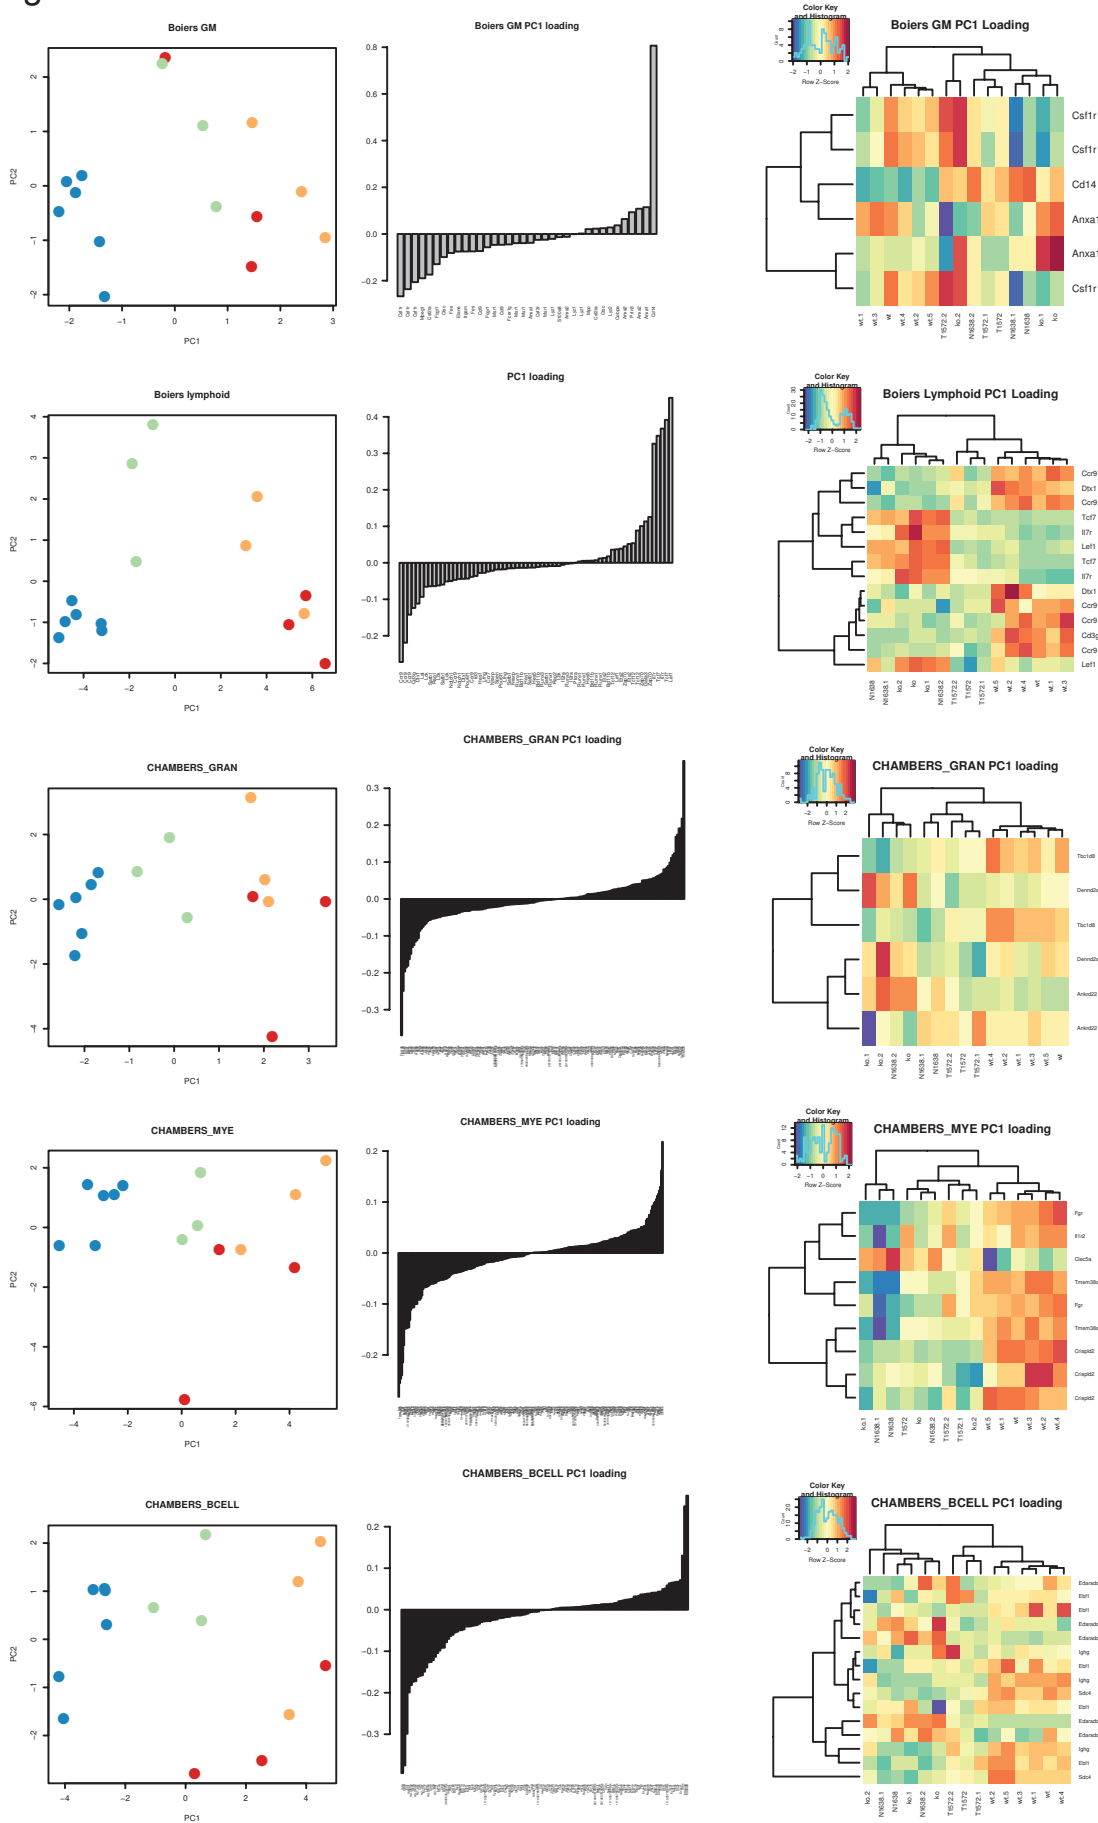

Differentiation signatures as determined by Boiers (Cell Stem Cell 2013) and Chambers (Cell Stem Cell 2007). Stem cell signature, such as proposed by Ivanova (Science 2002), Forsberg (PLoS One 2010), Chambers (Cell Stem Cell 2007) and de Graaf (PNAS 2010) and Ridell (Cell 2014) were mostly driven by only a few genes.

Figure S3

Montes 2011 apoptosis

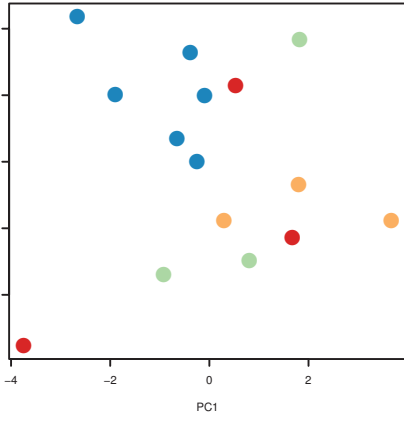

Montes 2011 apoptosis PC1 loading

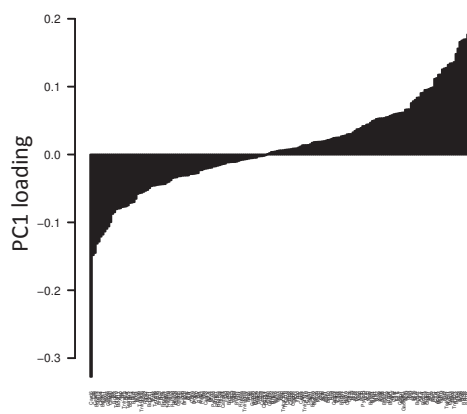

Proapoptotic signature

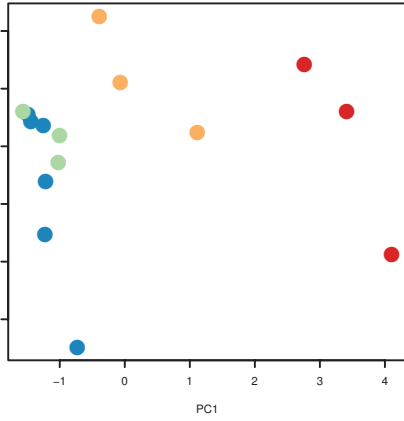

Proapoptotic PC1 loading

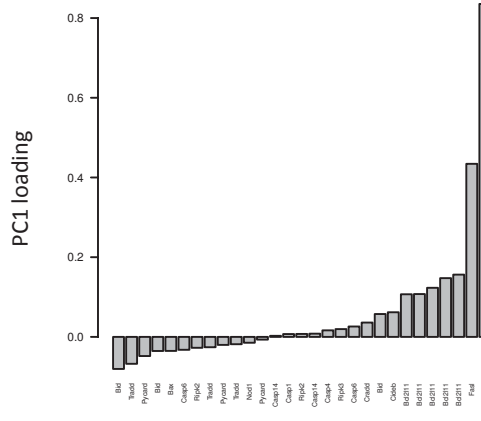

Wnt targets

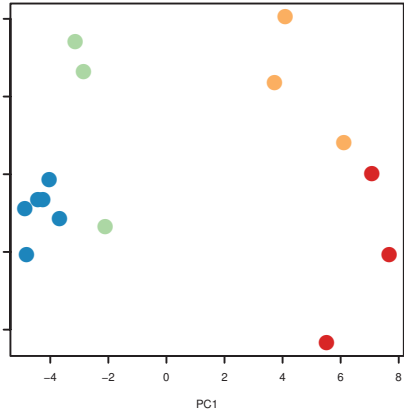

Wnt PC1 loading

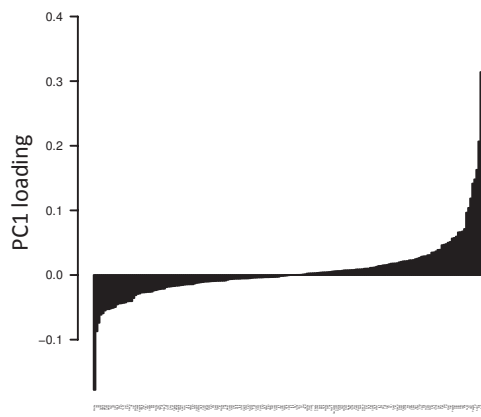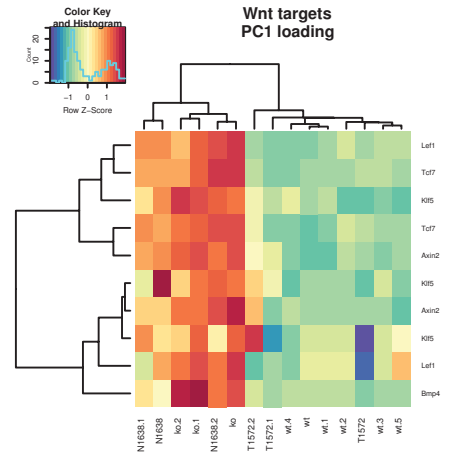



Figure S4

A

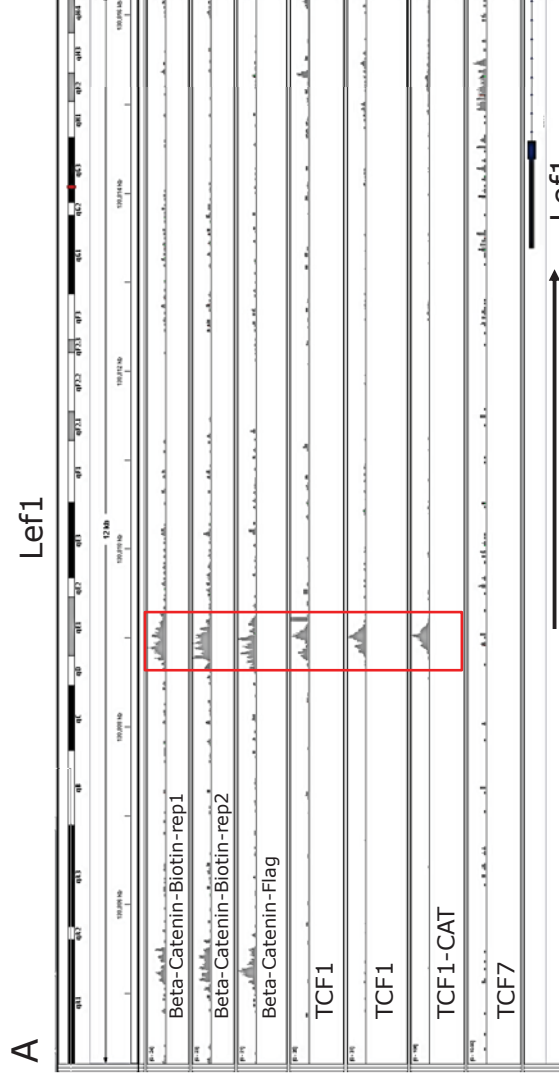

**Axin2**

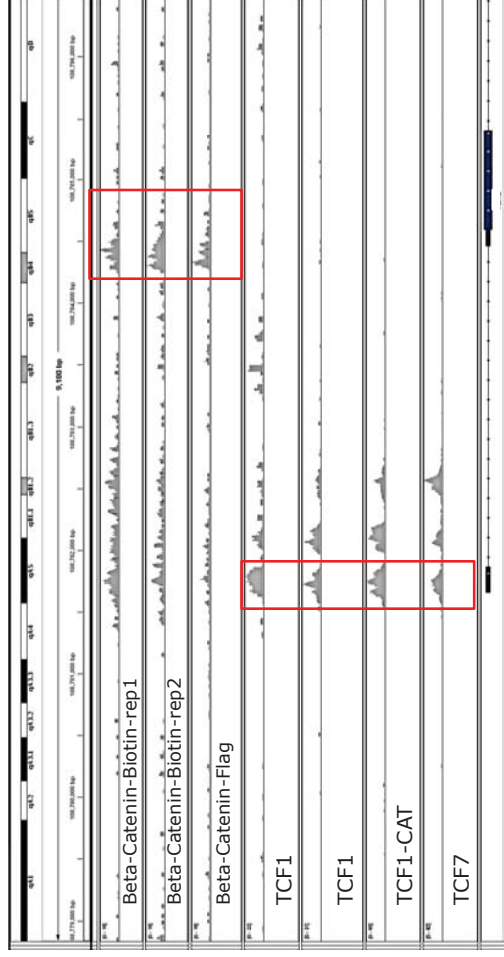

B

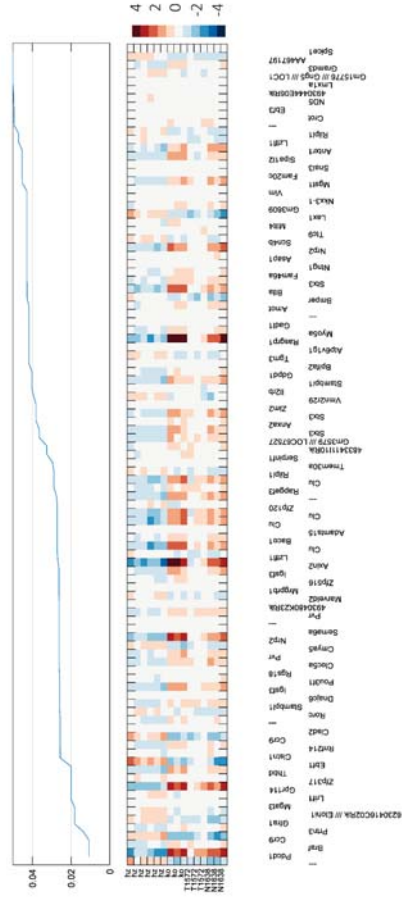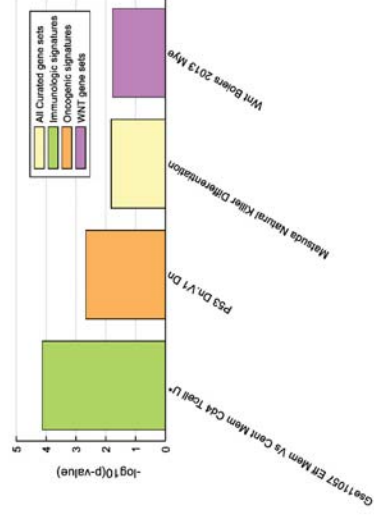

Table S1

| Gene-set                | Pathway                                                  | P <sub>adj</sub> < 0.05 | Genes                                                                                                                                                                                                                                                                         |
|-------------------------|----------------------------------------------------------|-------------------------|-------------------------------------------------------------------------------------------------------------------------------------------------------------------------------------------------------------------------------------------------------------------------------|
| All Curated gene sets   | MATSUDA_NATURAL_KILLER_DIFFERENTIATION                   | 6.58E-06                | ANXA1, APCDD1, CCR9, CD160, CDC23, GPR34, IL2RB, MYO5A, NTRK3, PDCD1, PLAGL1, PRSS23, PTPRF, PVR, SH3BGR2, SYTL2, TCF7, TULP3, XCL1, ZC3H12C                                                                                                                                  |
| All Curated gene sets   | PICCALUGA_ANGIOIMMUNOBLASTIC_LYMPHOMA_UP                 | 0.0002209               | ANTXR1, CD93, CLU, DCLK1, FN1, FSTL1, IL18, LAMC1, PLA2G4C, RAI14, TMEM163, TNS1                                                                                                                                                                                              |
| All Curated gene sets   | LIU_PROSTATE_CANCER_DN                                   | 0.0002209               | BEND5, CHST2, CLU, CRISPLD2, EPAS1, GPR155, ITGA2, PHLDA1, PLAGL1, PRSS23, RHOJ, ROBO1, TFCP2L1, THBD, TNFRSF25, TP52L1                                                                                                                                                       |
| All Curated gene sets   | ONDER_CDH1_TARGETS_2_DN                                  | 0.0002209               | ALDH1A3, CD83, CDK5R1, EPAS1, FGD6, FST, GJB5, IGSF3, IL18, ITGA2, KLF5, PTPRF, ROBO1, TFCP2L1, THBD, TNFRSF25, TP52L1                                                                                                                                                        |
| All Curated gene sets   | DELAYS_THYROID_CANCER_UP                                 | 0.0006965               | ALDH1A3, ANXA1, CHST2, DPP4, ENTPD1, FN1, IGSF3, ITGA2, MED13, NRP2, NT5E, P4HA2, PRSS23, PTPRF, S100A5, STX3                                                                                                                                                                 |
| All Curated gene sets   | ST_WNT_BETA_CATENIN_PATHWAY                              | 0.001009                | APC, AXIN2, DKK2, FSTL1, NKD1, WIF1                                                                                                                                                                                                                                           |
| All Curated gene sets   | SANA_TNF_SIGNALING_DN                                    | 0.001009                | ANTXR1, ANXA1, CLU, EPAS1, GIMAP6, NT5E, PHLDA1, RHOJ                                                                                                                                                                                                                         |
| All Curated gene sets   | GOZGIT_ESR1_TARGETS_DN                                   | 0.001305                | ABHD2, CLU, DCLK1, FETUB, GFRA1, GPC4, MB21D2, MYO5A, PPAP2A, PRSS23, RASGRP1, RNF144B, SDK1, SH3BGR2, SHROOM3, SIPA1L2, SYTL2, THBD, THSD4                                                                                                                                   |
| All Curated gene sets   | CUI_TCF21_TARGETS_2_UP                                   | 0.001305                | ANTXR1, APCDD1, ARSB, BMP4, BMPER, CLU, DCLK1, EMID1, FN1, GAS2L3, HUNK, KLF5, LYPD6B, NKD1, NRP2                                                                                                                                                                             |
| All Curated gene sets   | GAVIN_PDE3B_TARGETS                                      | 0.001305                | ENTPD1, IL18, LAMC1, NT5E, SYTL2                                                                                                                                                                                                                                              |
| All Curated gene sets   | NABA_MATRISOME                                           | 0.003449                | ADAM22, ANXA1, BMP4, BMPER, CRISPLD2, ELFN1, EMID1, FN1, FREM2, FST, FSTL1, GPC4, IL18, ISM1, KY, LAMC1, P4HA2, S100A5, SCUBE3, THSD4, WIF1, XCL1                                                                                                                             |
| All Curated gene sets   | KEGG_WNT_SIGNALING_PATHWAY                               | 0.00359                 | APC, AXIN2, CAMK2D, DKK2, LEF1, NFATC2, NKD1, TCF7, WIF1                                                                                                                                                                                                                      |
| All Curated gene sets   | CERVERA_SDHB_TARGETS_1_UP                                | 0.00389                 | CAMD2, CCDC109B, FSTL1, IL18, LYPD6B, PACSIN1, PRSS23, TNFRSF19                                                                                                                                                                                                               |
| All Curated gene sets   | KINSEY_TARGETS_OF_EWSR1_FLII_FUSION_DN                   | 0.005222                | CAMK2D, DCLK1, DLG1, FAM63A, FN1, FSTL1, LAMC1, MB21D2, NT5E, PHLDA1, PRSS23, SIPA1L2                                                                                                                                                                                         |
| All Curated gene sets   | CHARAFE_BREAST_CANCER_LUMINAL_VS_BASAL_DN                | 0.005292                | ADA, ALDH1A3, ANTXR1, ANXA1, CD14, FST, FSTL1, IL18, IL2RB, IL7R, KLF5, LAMC1, NT5E, PHLDA1, ZC3H12C                                                                                                                                                                          |
| All Curated gene sets   | RIGGI_EWING_SARCOMA_PROGENITOR_DN                        | 0.007768                | ABHD2, ALDH1A3, BACE1, BMP4, CLU, FST, NRP2, PHLDA1, TNFRSF19                                                                                                                                                                                                                 |
| All Curated gene sets   | SANSOM_WNT_PATHWAY_REQUIRE_MYC                           | 0.008652                | AXIN2, LEF1, NKD1, TCF7, TNFRSF19, WIF1                                                                                                                                                                                                                                       |
| All Curated gene sets   | PASQUALUCCI_LYMPHOMA_BY_GC_STAGE_UP                      | 0.008714                | ADA, ANTXR1, ENTPD1, IRF4, NUDT4, OSBP1A, PHLDA1, PVR, SH3BGR2, SHROOM3, TULP3                                                                                                                                                                                                |
| All Curated gene sets   | BYSTRYKH_HEMATOPOIESIS_STEM_CELL_QTL_TRANS               | 0.008714                | AXIN2, CD14, CHST2, EFHD1, EXTL3, FAM63A, GFRA1, GPC4, IL2RB, KIF5C, LEF1, MYO5A, PDCD1, STX3, SULT1A1, TEK, TFCP2L1, THBD, TULP3, XCL1                                                                                                                                       |
| All Curated gene sets   | GAUSSMANN_MLL_AF4_FUSION_TARGETS_F_UP                    | 0.009692                | ARHGAP28, ARSB, BMP4, BMPER, FST, GPC4, IL18, NT5E, TEK                                                                                                                                                                                                                       |
| All Curated gene sets   | GAVIN_FOXP3_TARGETS_CLUSTER_P4                           | 0.01055                 | CCDC109B, CD83, EPAS1, IL2RB, LYPD6B, PLAGL1, SH3BGR2                                                                                                                                                                                                                         |
| All Curated gene sets   | KEGG_CYTOKINE_CYTOKINE_RECEPTOR_INTERACTION              | 0.01299                 | CCR2, CCR9, EDAR, IL17RB, IL18, IL2RB, IL7R, TNFRSF19, TNFRSF25, XCL1                                                                                                                                                                                                         |
| All Curated gene sets   | DODD_NASOPHARYNGEAL_CARCINOMA_UP                         | 0.01525                 | ABHD2, ALDH1A3, ANXA1, APCDD1, ATP13A4, BACE1, BDH1, BEND5, CAND2, CLU, EDAR, EPAS1, FAM63A, FN1, IL18, KLF5, LYPD6B, PRKAA2, PRSS23, SH3BGR2, SMPD3, SNX31, SYTL2, TNFRSF19, TNS1, TUBB3                                                                                     |
| All Curated gene sets   | CREIGHTON_ENDOCRINE_THERAPY_RESISTANCE_1                 | 0.01646                 | BMPER, CCDC101, CRISPLD2, DLG1, EFHD1, FREM2, GFRA1, ITGA2, MB21D2, MYO5A, PRSS23, SYTL2, THSD4, TP52L1                                                                                                                                                                       |
| All Curated gene sets   | SMID_BREAST_CANCER_NORMAL_LIKE_UP                        | 0.01763                 | CCR2, CD93, CLU, DPP4, GIMAP6, IL7R, LEF1, NT5E, SNCAIP, THBD, TNFRSF25, WIF1, XCL1                                                                                                                                                                                           |
| All Curated gene sets   | SMIRNOV_CIRCULATING_ENDOTHELIOCYTES_IN_CANCER_UP         | 0.01851                 | B4GALT5, CD14, CD93, CLU, EPAS1, PRSS23, THBD, TNS1                                                                                                                                                                                                                           |
| All Curated gene sets   | WALLACE_PROSTATE_CANCER_RACE_UP                          | 0.01852                 | CCDC109B, CD83, CD93, CLU, DLG1, GIMAP6, IL7R, RASGRP1, THBD, TMEM35                                                                                                                                                                                                          |
| All Curated gene sets   | OL_PLASMACYTOMA_UP                                       | 0.02286                 | CARD11, CCR2, CD3G, CLU, DPP4, IL17RB, IL18, IL2RB, TUBB3, XCL1                                                                                                                                                                                                               |
| All Curated gene sets   | AMIT_EGF_RESPONSE_480_HELA                               | 0.02337                 | ABHD2, DCLK1, FST, ITGA2, NUDT4, PTPRF, PVR, TUBB3                                                                                                                                                                                                                            |
| All Curated gene sets   | NABA_MATRISOME_ASSOCIATED                                | 0.03018                 | ADAM22, ANXA1, BMP4, ELFN1, FREM2, FST, FSTL1, GPC4, IL18, ISM1, KY, P4HA2, S100A5, SCUBE3, WIF1, XCL1                                                                                                                                                                        |
| All Curated gene sets   | REACTOME_IMMUNE_SYSTEM                                   | 0.03141                 | BTLA, CAMK2D, CARD11, CCR2, CD14, CD160, CD3G, CDC23, IL18, IL2RB, IL7R, IRF4, OSBP1A, PDCD1, PVR, RASGRP1, RASGRP1, RNF144B                                                                                                                                                  |
| All Curated gene sets   | FULCHER_INFLAMMATORY_RESPONSE_LECTIN_VS_LPS_UP           | 0.03141                 | ABHD2, CD93, CHST2, FN1, IL7R, IRF4, MB21D2, MYO5A, NRP3, P4HA2, PHLDA1, RAI14, RASGRP1, THBD                                                                                                                                                                                 |
| All Curated gene sets   | SCHAEFFER_PROSTATE_DEVELOPMENT_48HR_UP                   | 0.03313                 | ALDH1A3, ANXA1, BDH1, CLU, CRISPLD2, EDARADD, GPR155, NT5E, PPFIBP2, SULT1A1, TFCP2L1, TP52L1, WIF1                                                                                                                                                                           |
| All Curated gene sets   | KIM_MYC_AMPLIFICATION_TARGETS_DN                         | 0.03336                 | DCLK1, GAS2L3, IL17RB, KLF5, NFATC2, SHROOM3                                                                                                                                                                                                                                  |
| All Curated gene sets   | LIM_MAMMARY_STEM_CELL_UP                                 | 0.04392                 | ANTXR1, EDARADD, EPAS1, FST, ISM1, LAMC1, NRP2, NT5E, PPAP2A, RHOJ, THSD1, TNS1, WIF1                                                                                                                                                                                         |
| All Curated gene sets   | KEGG_BASAL_CELL_CARCINOMA                                | 0.04862                 | APC, AXIN2, BMP4, LEF1, TCF7                                                                                                                                                                                                                                                  |
| All Curated gene sets   | TAKEEDA_TARGETS_OF_NUP98_HOXA9_FUSION_8D_DN              | 0.04862                 | ANTXR1, CD14, CLU, ENTPD1, EPAS1, GPR34, IL7R, TMEM163                                                                                                                                                                                                                        |
| All Curated gene sets   | LINDGREN_BLADDER_CANCER_CLUSTER_2B                       | 0.0498                  | CRISPLD2, EFHD1, ENTPD1, IL17R, LEF1, MYO5A, NRP2, TBC1D8, TCF7, THBD, TNS1                                                                                                                                                                                                   |
| All Curated gene sets   | NUYTEN_EZH2_TARGETS_UP                                   | 0.0488                  | ANXA1, AXIN2, B4GALT5, BACE1, CCDC109B, CD83, FGD6, FN1, GPR155, NT5E, P4HA2, PLAGL1, PRRG1, PTPRF, ROBO1, STX3, TCF7, THSD1, ZC3H12C                                                                                                                                         |
| All Curated gene sets   | SCHAEFFER_PROSTATE_DEVELOPMENT_48HR_DN                   | 0.0488                  | ANTXR1, CD83, CHDH, DKK2, GAS2L3, HUNK, LYPD6B, NRP2, P4HA2, PRTG, RHOJ, SIPA1L2                                                                                                                                                                                              |
| Computational gene sets | MODULE_46                                                | 2.83E-06                | ADA, CCR2, CCR9, CD14, CD3G, CD83, CDK5R1, CLU, DPP4, ENTPD1, FN1, IL18, IL2RB, IL7R, P4HA2, PDCD1, XCL1                                                                                                                                                                      |
| Computational gene sets | MODULE_75                                                | 2.83E-06                | ADA, CCR2, CCR9, CD14, CD3G, CD83, CDK5R1, CLU, DPP4, FN1, IL18, IL2RB, IL7R, P4HA2, PDCD1, TEK, XCL1                                                                                                                                                                         |
| Gene ontology (GO)      | PLASMA_MEMBRANE_PART                                     | 0.000438                | ACTN2, APC, BACE1, CAACNA1B, CAACNA1D, CARD11, CCR2, CCR9, CD160, CD83, DCLK1, ENTPD1, GPC4, GPR34, IL17RB, IL2RB, ITGA2, NTRK3, PRRG1, PTPRF, ROBO1, SHROOM3, STX3, SYTL2, TEK, THBD, TNFRSF25                                                                               |
| Gene ontology (GO)      | MEMBRANE                                                 | 0.0006684               | ACTN2, APC, BACE1, CAACNA1B, CAACNA1D, CARD11, CCR2, CCR9, CD14, CD160, CD83, CDK5R1, DCLK1, ENTPD1, GPC4, GPR114, GPR114, GPR34, IL17RB, IL2RB, ITGA2, NTRK3, PLA2G4C, PPAP2A, PRRG1, PTPRF, PVR, RNF144B, ROBO1, SHROOM3, SLCT7A4, STX3, SYTL2, TBC1D8, TEK, THBD, TNFRSF25 |
| Gene ontology (GO)      | PLASMA_MEMBRANE                                          | 0.0007698               | ACTN2, APC, BACE1, CAACNA1B, CAACNA1D, CARD11, CCR2, CCR9, CD14, CD160, CD83, DCLK1, ENTPD1, GPC4, GPR34, IL17RB, IL2RB, ITGA2, NTRK3, PPAP2A, PRRG1, PTPRF, ROBO1, SHROOM3, STX3, SYTL2, TEK, THBD, TNFRSF25                                                                 |
| Gene ontology (GO)      | MEMBRANE_PART                                            | 0.001722                | ACTN2, APC, BACE1, CAACNA1B, CAACNA1D, CARD11, CCR2, CCR9, CD160, CD83, DCLK1, ENTPD1, GPC4, GPR114, GPR34, IL17RB, IL2RB, ITGA2, NTRK3, PRRG1, PTPRF, PVR, RNF144B, ROBO1, SHROOM3, SLCT7A4, STX3, SYTL2, TEK, THBD, TNFRSF25                                                |
| Gene ontology (GO)      | SIGNAL_TRANSDUCTION                                      | 0.007247                | ANXA1, AXIN2, CCR2, CCR9, CD14, CD160, CD3G, CD83, CDK5R1, DLG1, EDARADD, EPAS1, FGD6, GPR34, HUNK, IL2RB, IL7R, KCNIP2, MED13, NTRK3, NUDT4, PPAP2A, PRKAA2, PTPRF, RASGRP1, TEK, TNFRSF25, TP52L1, XCL1                                                                     |
| Gene ontology (GO)      | RESPONSE_TO_EXTERNAL_STIMULUS                            | 0.01613                 | AHSG, ANXA1, CCR2, CCR9, CHST2, ENTPD1, ITGA2, PGLYRP2, SHROOM3, THBD, XCL1                                                                                                                                                                                                   |
| Gene ontology (GO)      | RECEPTOR_ACTIVITY                                        | 0.01613                 | CD14, CD160, CD3G, GFRA1, GPR114, IL2RB, IL7R, MED13, NRP2, PGLYRP2, PTPRF, PVR, ROBO1, TEK, TNFRSF25                                                                                                                                                                         |
| Hallmark gene sets      | HALLMARK_ESTROGEN_RESPONSE_EARLY                         | 0.004103                | ABHD2, DLG1, FAM63A, GFRA1, IL17RB, PRSS23, RASGRP1, THSD4, TP52L1                                                                                                                                                                                                            |
| Hallmark gene sets      | HALLMARK_INFLAMMATORY_RESPONSE                           | 0.006397                | CD14, CHST2, IL18, IL2RB, IL7R, PVR, RASGRP1, RNF144B                                                                                                                                                                                                                         |
| Hallmark gene sets      | HALLMARK_COAGULATION                                     | 0.006397                | ANXA1, CLU, DPP4, FN1, ITGA2, PRSS23, THBD                                                                                                                                                                                                                                    |
| Hallmark gene sets      | HALLMARK_IL2_STATS_SIGNALING                             | 0.006397                | CD83, IL2RB, IRF4, NT5E, PHLDA1, PLAGL1, PPAP2A, SH3BGR2                                                                                                                                                                                                                      |
| Hallmark gene sets      | HALLMARK_WNT_BETA_CATENIN_SIGNALING                      | 0.01107                 | AXIN2, LEF1, NKD1, TCF7                                                                                                                                                                                                                                                       |
| Hallmark gene sets      | HALLMARK_COMPLEMENT                                      | 0.01636                 | ACTN2, CDK5R1, CLU, DPP4, FN1, KCNIP2, RASGRP1                                                                                                                                                                                                                                |
| Immunologic signatures  | GSE20366_EX_VIVO_VS_DEC205_CONVERSION_NAIVE_CD4_TCELL_UP | 0.001054                | ACTN2, CCR2, CD160, EPAS1, GPR114, GPR34, IL17RB, RASGRP1, THBD, XCL1, XKRX                                                                                                                                                                                                   |
| Immunologic signatures  | GSE24142_EARLY_THYMIC_PROGENITOR_VS_DN2_THYMOCYTE_DN     | 0.001054                | ADA, AXIN2, CCDC109B, CD3G, DPP4, EDARADD, IL17RB, IL7R, PDCD1, PTPRF, TUBB3                                                                                                                                                                                                  |
| Immunologic signatures  | GSE7852_TREG_VS_TCONV_LN_UP                              | 0.001054                | CCR2, CD83, ENTPD1, FGD6, IRF4, LAMC1, NT5E, PLAGL1, PPAP2A, ZC3H12C, ZDHHC23                                                                                                                                                                                                 |
| Immunologic signatures  | GSE10325_LUPUS_CD4_TCELL_VS_LUPUS_BCELL_UP               | 0.003344                | ANXA1, CCDC109B, CD93, DPP4, GIMAP6, IL7R, LEF1, TCF7, TNFRSF25, ZCCHC14                                                                                                                                                                                                      |
| Immunologic signatures  | GSE30962_PRIMARY_VS_SECONDARY_CHRONIC_LOMV_INF_CD8_TCELL | 0.003403                | AHSG, ANXA1, CD93, ENTPD1, EPAS1, GPR114, GPR34, PRKAA2, RASGRP1, TMEM163                                                                                                                                                                                                     |
| Immunologic signatures  | GSE24142_EARLY_THYMIC_PROGENITOR_VS_DN2_THYMOCYTE_ADULT  | 0.004089                | AXIN2, CCDC109B, CD3G, EDARADD, IL17RB, IL7R, LEF1, PPAP2A, PTPRF, SYTL2                                                                                                                                                                                                      |
| Immunologic signatures  | GSE7460_TCONV_VS_TREG_LN_DN                              | 0.004089                | CCR2, DPP4, ENTPD1, IL2RB, IRF4, NT5E, PPAP2A, SH3BGR2, ZC3H12C, ZDHHC23                                                                                                                                                                                                      |
| Immunologic signatures  | GSE20366_EX_VIVO_VS_DEC205_CONVERSION_NAIVE_CD4_TCELL_DN | 0.0137                  | ANXA1, CCDC109B, CD83, DCLK1, IL18, PLAGL1, RNF144B, SNX31, STX3                                                                                                                                                                                                              |
| Immunologic signatures  | GSE10325_CD4_TCELL_VS_BCELL_UP                           | 0.01559                 | ANXA1, CCR2, CD3G, DPP4, GIMAP6, IL2RB, LEF1, RASGRP1, TNFRSF25                                                                                                                                                                                                               |
| Immunologic signatures  | GSE24142_EARLY_THYMIC_PROGENITOR_VS_DN3_THYMOCYTE_DN     | 0.01559                 | ADA, CCDC109B, GFRA1, IL7R, LEF1, PDCD1, PTPRF, TUBB3, TULP3                                                                                                                                                                                                                  |
| Immunologic signatures  | GSE39820_CTRL_VS_IL1B_IL6_IL23A_CD4_TCELL_UP             | 0.01559                 | CCDC, GAS2L3, GPR34, LYPD6B, PACSIN1, PHLDA1, PLAGL1, RASGRP1, SYTL2                                                                                                                                                                                                          |
| Immunologic signatures  | GSE7460_TCONV_VS_TREG_THYMUS_DN                          | 0.01559                 | CCDC109B, CD83, IGSF3, IL2RB, KIF5C, NRP2, PLAGL1, PPAP2A, SH3BGR2                                                                                                                                                                                                            |
| Immunologic signatures  | GSE7852_TREG_VS_TCONV_THYMUS_UP                          | 0.01634                 | CCDC109B, CCR2, CD83, IGSF3, KIF5C, PDCD1, PLAGL1, PPAP2A, SH3BGR2                                                                                                                                                                                                            |
| Immunologic signatures  | GSE24142_DN2_VS_DN3_THYMOCYTE_DN                         | 0.01649                 | CCR9, CD3G, GFRA1, IRF4, LEF1, PHLDA1, PTPRF, TBC1D8, TULP3                                                                                                                                                                                                                   |
| Immunologic signatures  | GSE3982_BCELL_VS_CENT_MEMORY_CD4_TCELL_DN                | 0.03801                 | DLG1, DPP4, IL7R, ITGA2, PHLDA1, PRKAA2, TCF7, TNS1                                                                                                                                                                                                                           |
| Immunologic signatures  | GSE3982_MEMORY_CD4_TCELL_VS_BCELL_UP                     | 0.04586                 | ANXA1, CAND2, CD3G, DPP4, GIMAP6, IL2RB, KIF5C, PHLDA1                                                                                                                                                                                                                        |
| Motif gene sets         | TTGTTT_VSFOXA04_01                                       | 0.0001493               | ANXA1, APC, AXIN2, BDH1, BMP4, CCDC109B, CD83, DLG1, EDAR, ENTPD1, EXTL3, FAM63A, FN1, FST, FSTL1, GFRA1, IL18, IL7R, IRF4, ITGA2, KCNIP2, KLF5, LAMC1, NKD1, NRP2, NTRK3, RNF214, ROBO1, SCU3E3, SDK1, SMPD3, SNCAIP, SYTL2, TEK, TNFRSF19, XKRX, ZCCHC14                    |
| Motif gene sets         | CTTTGA_VSLEF1_Q2                                         | 0.0001493               | ABHD2, ATP13A4, BACE1, CD160, CPB1, DLG1, EMID1, FAM63A, FST, GFRA1, GPC4, KIF7, KY, LEF1, MB21D2, MED13, NKD1, NRP2, ROBO1, SESTD1, SLC22A23, SNCAIP, SYTL2, TBC1D8, TCF7, TNFRSF19, XKRX                                                                                    |
| Motif gene sets         | TGGAAA_VSNFAT_Q4_01                                      | 0.006435                | ANTXR1, B4GALT5, BMP4, CHDH, DCLK1, DKK2, DLG1, EFHD1, FN1, FST, FSTL1, GALNT7, IGSF3, IL17RB, IL7R, IRF4, ITGA2, KCNIP2, KLF5, MED13, NFATC2, SCUBE3, SH3BGR2, SMPD3, SNCAIP, TBC1D8, TMEM163, TMEM35, TNFRSF19, TNS1, XKRX                                                  |
| Motif gene sets         | VSTCF4_Q5                                                | 0.009151                | ABHD2, FAM63A, FST, GPC4, KY, NKD1, NRP2, SYTL2, TCF7, TNFRSF19                                                                                                                                                                                                               |
| Oncogenic signatures    | CAMP_UP_V1_DN                                            | 1.97E-05                | ANXA1, BACE1, CAMK2D, CCR9, CD160, CD83, CHST2, FSTL1, IL7R, NFATC2, TUBB3, ZCCHC14                                                                                                                                                                                           |
| Oncogenic signatures    | MEL18_DN_V1_UP                                           | 0.03587                 | CD83, CHST2, CRISPLD2, IL7R, NRP2, NT5E, TEK                                                                                                                                                                                                                                  |

| <b>Table S2</b>    |              |                                               |                                            |                                                                       |
|--------------------|--------------|-----------------------------------------------|--------------------------------------------|-----------------------------------------------------------------------|
| <b>Experiment</b>  | <b>Study</b> | <b>Significantly detected binding regions</b> | <b>Mapped to genes within 5Kb from TSS</b> | <b>P-value, Significance with WNT-associated genesets from MsigDB</b> |
| TCF1               | GSE52070     | 591                                           | 116                                        | 0.033                                                                 |
| TCF1 (n=2)         | GSE46662     | 732 in Sample 1                               | 131                                        | 0.050                                                                 |
|                    |              | 2600 in Sample 2                              | 653                                        | 9.395E-04                                                             |
| TCF7               | GSE31221     | 6395                                          | 2015                                       | 0.017                                                                 |
| Beta-Catenin (n=3) | GSE43565     | 990 in Sample 1                               | 121                                        | 2.273E-04                                                             |
|                    |              | 385 in Sample 2                               | 49                                         | 9.564E-04                                                             |
|                    |              | 671 in Sample 3                               | 79                                         | 0.004                                                                 |

Table S3

| Gene-set              | Pathway                                                     | P <sub>adj</sub> <0.05 | Genes                                                                                                                                                           |
|-----------------------|-------------------------------------------------------------|------------------------|-----------------------------------------------------------------------------------------------------------------------------------------------------------------|
| WNT gene sets         | WNT_BOIERS_2013_LYMPHOID                                    | 0.01053                | CCR9,LEF1,TCF7                                                                                                                                                  |
| All Curated gene sets | ST_WNT_BETA_CATENIN_PATHWAY                                 | 0.0001483              | APC,AXIN2,DKK2,FSTL1,NKD1,WIF1                                                                                                                                  |
| All Curated gene sets | RIGGI_EWING_SARCOMA_PROGENITOR_DN                           | 0.0006029              | ALDH1A3,BACE1,BMP4,CLU,EBF1,FST,NRP2,PHLDA1,TNFRSF19                                                                                                            |
| All Curated gene sets | SANSOM_WNT_PATHWAY_REQUIRE_MYC                              | 0.001274               | AXIN2,LEF1,NKD1,TCF7,TNFRSF19,WIF1                                                                                                                              |
| All Curated gene sets | LIU_PROSTATE_CANCER_DN                                      | 0.001855               | BEND5,CHST2,CLU,EPAS1,ITGA2,NDNF,PHLDA1,PRSS23,ROBO1,TFCP2L1,WIF1,ZCCHC14                                                                                       |
| All Curated gene sets | MATSUDA_NATURAL_KILLER_DIFFERENTIATION                      | 0.001855               | ANXA1,APCDD1,CCR9,CD160,EBF1,NTRK3,PCDD1,PRSS23,SH3BGR2,TCF7,TULP3,ZC3H12C                                                                                      |
| All Curated gene sets | KINSEY_TARGETS_OF_EWSR1_FLII_FUSION_DN                      | 0.001979               | DCLK1,EBF1,FAM63A,FSTL1,IL17RD,MB21D2,NT5E,PHLDA1,PRSS23,SIPA1L2                                                                                                |
| All Curated gene sets | KUMAR_TARGETS_OF_MLL_AF9_FUSION                             | 0.001979               | ANXA1,CCR9,CD83,EBF1,EXTL3,GPC4,IL7R,IRF4,LEF1,TCF7,TNFRSF19                                                                                                    |
| All Curated gene sets | CUI_TCF21_TARGETS_2_UP                                      | 0.003067               | ANTXR1,APCDD1,ARSB,BMP4,CLU,DCLK1,HUNK,KLF5,LYPD6B,NKD1,NRP2                                                                                                    |
| All Curated gene sets | CHARAFE_BREAST_CANCER_LUMINAL_VS_BASAL_DN                   | 0.003672               | ADA,ALDH1A3,ANTXR1,ANXA1,FST,FSTL1,IL7R,KLF5,NT5E,PHLDA1,ZC3H12C                                                                                                |
| All Curated gene sets | DODD_NASOPHARYNGEAL_CARCINOMA_UP                            | 0.003672               | ALDH1A3,ANXA1,APCDD1,ATP13A4,BACE1,BDH1,BEND5,CLU,EBF1,EDAR,EPAS1,FAM63A,KLF5,LYPD6B,PRKAA2,PRSS23,SH3BGR2,TNFRSF19,TUBB3,UST,WWC1                              |
| All Curated gene sets | DELYS_THYROID_CANCER_UP                                     | 0.003672               | ALDH1A3,ANXA1,CHST2,DPP4,IGSF3,ITGA2,MED13,NRP2,NT5E,PRSS23,STX3                                                                                                |
| All Curated gene sets | ONDER_CDH1_TARGETS_2_DN                                     | 0.004116               | ALDH1A3,CD83,EPAS1,FST,IGSF3,ITGA2,KLF5,ROBO1,TFCP2L1,THBD,WWC1                                                                                                 |
| All Curated gene sets | SANA_TNF_SIGNALING_DN                                       | 0.004116               | ANTXR1,ANXA1,CLU,EPAS1,NT5E,PHLDA1                                                                                                                              |
| All Curated gene sets | KEGG_WNT_SIGNALING_PATHWAY                                  | 0.004871               | APC,AXIN2,DKK2,LEF1,NKD1,TCF7,WIF1                                                                                                                              |
| All Curated gene sets | KEGG_BASAL_CELL_CARCINOMA                                   | 0.005932               | APC,AXIN2,BMP4,LEF1,TCF7                                                                                                                                        |
| All Curated gene sets | CUI_TCF21_TARGETS_2_DN                                      | 0.006368               | ANXA1,ARHGAP28,BACE1,DKK2,DPP4,EBF1,EPAS1,MED13,NT5E,PPAP2A,SH3BGR2,SHROOM3,SNCAIP,THBD                                                                         |
| All Curated gene sets | BYSTRYKH_HEMATOPOIESIS_STEM_CELL_QTL_TRANS                  | 0.01287                | AXIN2,CHST2,EFHD1,EXTL3,FAM63A,GPC4,KIF5C,LEF1,PCDD1,STX3,SULT1A1,TFCP2L1,THBD,TULP3                                                                            |
| All Curated gene sets | GAUSSMANN_MLL_AF4_FUSION_TARGETS_F_UP                       | 0.0141                 | ARHGAP28,ARSB,BMP4,FST,GPC4,IL17RD,NT5E                                                                                                                         |
| All Curated gene sets | CHARAFE_BREAST_CANCER_LUMINAL_VS_MESENCHYMAL_DN             | 0.01879                | ANTXR1,ANXA1,CHST2,FST,FSTL1,IL7R,NT5E,PHLDA1,RAI14,ZC3H12C                                                                                                     |
| All Curated gene sets | GOZGIT_ESR1_TARGETS_DN                                      | 0.03962                | CLU,DCLK1,FETUB,GPC4,MB21D2,PPAP2A,PRSS23,RASGRP1,SH3BGR2,SHROOM3,SIPA1L2,THBD                                                                                  |
| All Curated gene sets | ENK_UV_RESPONSE_EPIDERMIS_DN                                | 0.04184                | ANXA1,APC,CD83,ITGA2,PHLDA1,PPAP2A,PRSS23,RAI14,ROBO1,THBD                                                                                                      |
| All Curated gene sets | WNT_SIGNALING                                               | 0.04194                | APC,LEF1,NKD1,TCF7,WIF1                                                                                                                                         |
| All Curated gene sets | PID_PS1_PATHWAY                                             | 0.04605                | APC,DKK2,NKD1,WIF1                                                                                                                                              |
| All Curated gene sets | SENESE_HDAC1_AND_HDAC2_TARGETS_UP                           | 0.04605                | DCLK1,DKK2,EXTL3,IL7R,NRP3,PHLDA1,WWC1                                                                                                                          |
| All Curated gene sets | KIM_MYC_AMPLIFICATION_TARGETS_DN                            | 0.04605                | DCLK1,IL17RB,IL17RD,KLF5,SHROOM3                                                                                                                                |
| Motif gene sets       | TTGTTT_V\$FOXO4_01                                          | 3.15E-05               | ANXA1,APC,AXIN2,BDH1,BMP4,CCDC109B,CD83,EBF1,EDAR,EXTL3,FAM63A,FST,FSTL1,IL7R,IRF4,ITGA2,KCNIP2,KLF5,NKD1,NRP2,NTRK3,RNF214,ROBO1,SNCAIP,TNFRSF19,XKRXX,ZCCHC14 |
| Motif gene sets       | CTTTGA_V\$LEF1_Q2                                           | 0.0003071              | ATP13A4,BACE1,CD160,CPB1,FAM63A,FST,GPC4,KY,LEF1,MB21D2,MED13,NKD1,NRP2,ROBO1,SLC22A23,SNCAIP,TCF7,TNFRSF19,XKRXX                                               |
| Motif gene sets       | CAGGTG_V\$E12_Q6                                            | 0.001973               | ACTN2,AXIN2,BACE1,BMP4,CD83,CPB1,EBF1,EDAR,EPAS1,EXTL3,FST,IGSF3,ITGA2,KCNIP2,LEF1,LYPD6B,MB21D2,NRP3,NRP2,NTRK3,SH3BGR2,SNCAIP,TCF7,UNC45B,UST,WWC1            |
| Motif gene sets       | V\$TCF4_Q5                                                  | 0.005048               | FAM63A,FST,GPC4,KY,NKD1,NRP2,TCF7,TNFRSF19                                                                                                                      |
| Motif gene sets       | TGGAAA_V\$NFAT_Q4_01                                        | 0.006748               | ANTXR1,BMP4,DCLK1,DKK2,EBF1,EFHD1,FST,FSTL1,IGSF3,IL17RB,IL7R,IRF4,ITGA2,KCNIP2,KLF5,MED13,SH3BGR2,SNCAIP,TMEM163,TNFRSF19,XKRXX                                |
| Motif gene sets       | TATTATA_MIR-374                                             | 0.01408                | ARHGAP28,BACE1,CHST2,EDAR,MED13,RNF214,UST,ZCCHC14                                                                                                              |
| Motif gene sets       | TGCCAAR_V\$NF1_Q6                                           | 0.01468                | AHSG,AXIN2,DCLK1,KY,LEF1,MB21D2,MED13,NRP2,NTRK3,RAI14,ROBO1,XKRXX                                                                                              |
| Motif gene sets       | RTAAACA_V\$FREAC2_01                                        | 0.02911                | AXIN2,BMP4,FST,FSTL1,IRF4,KY,NTRK3,ROBO1,SNCAIP,TCF7,TNFRSF19,UNC45B,UST                                                                                        |
| Oncogenic signatures  | CAMP_UP.V1_DN                                               | 5.78E-06               | ANXA1,BACE1,CCR9,CD160,CD83,CHST2,FSTL1,IL7R,TUBB3,ZCCHC14                                                                                                      |
| Oncogenic signatures  | AKT_UP.V1_DN                                                | 0.04519                | AXIN2,EDARADD,TNFRSF19,TULP3,WIF1,ZC3H12C                                                                                                                       |
| Immunologic signature | GSE24142_EARLY_THYMIC_PROGENITOR_VS_DN2_THYMOCYTE_DN        | 0.001121               | ADA,AXIN2,CCDC109B,DPP4,EDARADD,IL17RB,IL7R,PCDD1,TUBB3                                                                                                         |
| Immunologic signature | GSE20366_EX_VIVO_VS_DEC205_CONVERSION_NAIVE_CD4_TCELL_UP    | 0.007534               | ACTN2,CD160,EPAS1,GPR114,IL17RB,RASGRP1,THBD,XKRXX                                                                                                              |
| Immunologic signature | GSE10325_LUPUS_CD4_TCELL_VS_LUPUS_BCELL_UP                  | 0.01556                | ANXA1,CCDC109B,DPP4,IL7R,LEF1,TCF7,ZCCHC14                                                                                                                      |
| Immunologic signature | GSE14350_IL2RB_KO_VS_WT_TREG_DN                             | 0.01556                | CCDC109B,CD160,CD83,KY,NT5E,PCDD1,ZC3H12C                                                                                                                       |
| Immunologic signature | GSE24142_EARLY_THYMIC_PROGENITOR_VS_DN3_THYMOCYTE_DN        | 0.01556                | ADA,CCDC109B,IL7R,LEF1,PCDD1,TUBB3,TULP3                                                                                                                        |
| Immunologic signature | GSE24142_EARLY_THYMIC_PROGENITOR_VS_DN2_THYMOCYTE_ADULT_DN  | 0.01556                | AXIN2,CCDC109B,EDARADD,IL17RB,IL7R,LEF1,PPAP2A                                                                                                                  |
| Immunologic signature | GSE26495_NAIVE_VS_PD1HIGH_CD8_TCELL_UP                      | 0.01556                | BDH1,BEND5,EDAR,EFHD1,LEF1,NT5E,PPAP2A                                                                                                                          |
| Immunologic signature | GSE26495_NAIVE_VS_PD1LOW_CD8_TCELL_UP                       | 0.01556                | BDH1,BEND5,EDAR,EFHD1,LEF1,NT5E,PPAP2A                                                                                                                          |
| Immunologic signature | GSE30962_PRIMARY_VS_SECONDARY_CHRONIC_LCMV_INF_CD8_TCELL_DN | 0.01556                | AHSG,ANXA1,EPAS1,GPR114,PRKAA2,RASGRP1,TMEM163                                                                                                                  |
| Immunologic signature | GSE3982_BCELL_VS_CENT_MEMORY_CD4_TCELL_DN                   | 0.01556                | DPP4,IL7R,ITGA2,NDNF,PHLDA1,PRKAA2,TCF7                                                                                                                         |
| Immunologic signature | GSE7460_TCONV_VS_TREG_LN_DN                                 | 0.01556                | CD83,DPP4,IRF4,NT5E,PPAP2A,SH3BGR2,ZC3H12C                                                                                                                      |
| Immunologic signature | GSE7460_TCONV_VS_TREG_THYMUS_DN                             | 0.01556                | CCDC109B,CD83,IGSF3,KIF5C,NRP2,PPAP2A,SH3BGR2                                                                                                                   |
| Immunologic signature | GSE7852_TREG_VS_TCONV_THYMUS_UP                             | 0.01556                | CCDC109B,CD83,IGSF3,KIF5C,PCDD1,PPAP2A,SH3BGR2                                                                                                                  |
| Hallmark gene sets    | HALLMARK_WNT_BETA_CATENIN_SIGNALING                         | 0.002609               | AXIN2,LEF1,NKD1,TCF7                                                                                                                                            |
| Hallmark gene sets    | HALLMARK_COAGULATION                                        | 0.002609               | ANXA1,CLU,DPP4,ITGA2,PRSS23,THBD                                                                                                                                |
| Hallmark gene sets    | HALLMARK_IL2_STAT5_SIGNALING                                | 0.007102               | CD83,IRF4,NT5E,PHLDA1,PPAP2A,SH3BGR2                                                                                                                            |
| Hallmark gene sets    | HALLMARK_KRAS_SIGNALING_DN                                  | 0.007102               | CHST2,CPB1,EDAR,EFHD1,PCDD1,TFCP2L1                                                                                                                             |
| Hallmark gene sets    | HALLMARK_ESTROGEN_RESPONSE_EARLY                            | 0.04111                | FAM63A,IL17RB,PRSS23,RASGRP1,WWC1                                                                                                                               |
| Hallmark gene sets    | HALLMARK_COMPLEMENT                                         | 0.04111                | ACTN2,CLU,DPP4,KCNIP2,RASGRP1                                                                                                                                   |
